# Supplementary material for: Interfacial modulation to achieve low lattice thermal conductivity and enhanced thermoelectric performance in n-type Mg3(Sb, Bi)2-based materials via graphene and MXene
Source: Royal Society of Chemistry journal article supplement (doi:10.1039/d3ta05238a), 2023-01-01
Supplement: d3ta05238a1.pdf [file d3ta05238a1.pdf]

## Supporting Information

# Interfacial modulation to low lattice thermal conductivity and enhanced thermoelectric performance in *n*-type Mg<sub>3</sub>(Sb, Bi)<sub>2</sub>-based materials *via* Graphene and MXene

Bang-Zhou Tian<sup>a</sup>, Yi-Yan Liao<sup>b</sup>, Fang Xu<sup>a</sup>, Xiao-Ling Qiu<sup>b</sup>, Fu-Jie Zhang<sup>a</sup>, Ran Ang<sup>a, c, \*</sup>

<sup>a</sup> *Key Laboratory of Radiation Physics and Technology, Ministry of Education, Institute of Nuclear Science and Technology, Sichuan University, Chengdu 610064, China*

<sup>b</sup> *School of Materials Science & Engineering, Sichuan University, Chengdu 610064, China*

<sup>c</sup> *Institute of New Energy and Low-Carbon Technology, Sichuan University, Chengdu 610065, China*

*\*Corresponding author and Email: [rang@scu.edu.cn](mailto:rang@scu.edu.cn)*

## 1. Lorenz number and density of state mass calculations

The Lorenz number ( $L$ ) and density of state mass ( $m^*$ ) is calculated using the single parabolic band (SPB) model with measured Seebeck coefficient ( $S$ ) and carrier concentration ( $n$ ) according to the following equations <sup>1</sup>:

$$S = \frac{k_B}{e} \left[ \left( \frac{(2+\lambda)F_{1+\lambda}(\mu)}{(1+\lambda)F_\lambda(\mu)} \right) - \mu \right]$$

$$F_i(\mu) = \int_0^\infty \frac{\varepsilon^i}{1+\exp(\varepsilon - \mu)} d\varepsilon$$

$$L = \left( \frac{k_B}{e} \right)^2 \left[ \frac{\lambda+3}{\lambda+1} \frac{F_{\lambda+2}(\mu)}{F_\lambda(\mu)} - \left( \frac{\lambda+2}{\lambda+1} \right)^2 \left( \frac{F_{\lambda+1}(\mu)}{F_\lambda(\mu)} \right)^2 \right]$$

$$m^* = \frac{h^2}{2k_B T} \left( \frac{n}{4\pi F_{1/2}(\mu)} \right)^{\frac{2}{3}}$$

Where  $\mu$  is reduced Fermi level,  $F_i(\mu)$  is Fermi integral,  $k_B$  is the Boltzmann constant,  $h$  is the Planck constant and  $\lambda$  is scattering parameter.

## 2. Weighted mobility calculation

Weighted mobility ( $\mu_w$ ) (electron mobility weighted by the density of electronic states) is obtained using the following equation <sup>2</sup>:

$$\mu_w = \frac{331}{\rho} \left( \frac{T}{300} \right)^{\frac{3}{2}} \left[ \frac{\exp\left(\frac{|S|}{k_B/e} - 2\right)}{1 + \exp\left[-5\left(\frac{|S|}{k_B/e} - 1\right)\right]} + \frac{\frac{3|S|}{\pi^2 k_B/e}}{1 + \exp\left[5\left(\frac{|S|}{k_B/e} - 1\right)\right]} \right]$$

Where  $\rho$  is electrical resistivity. Weighted mobility analysis can elucidate the electronic structure and scattering mechanisms in materials. At the optimal carrier concentration, the maximum of  $zT$  depends on the ratio of  $\mu_w / \kappa_L$ .

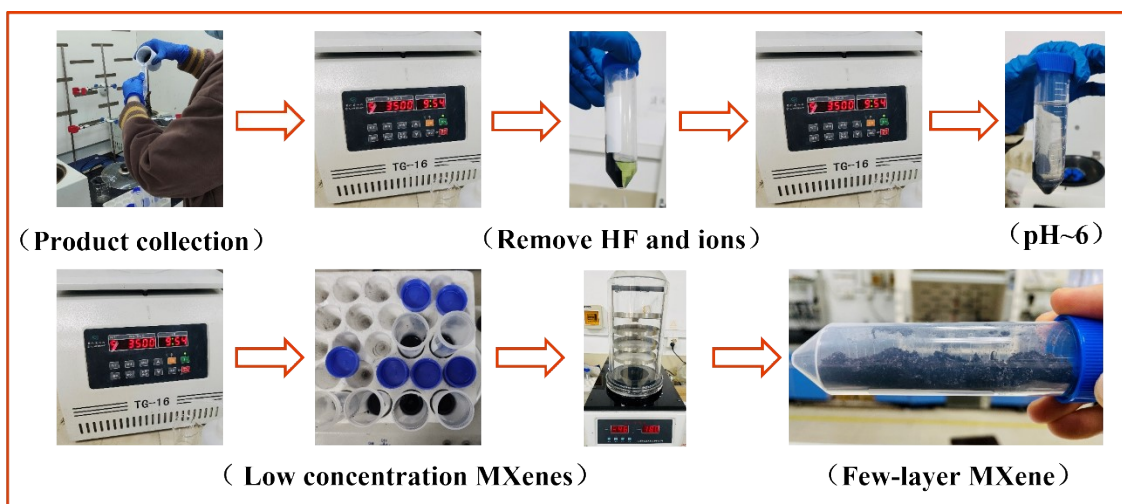

**Fig. S1** Few-layer MXene preparation process.

**Table S1** The density of  $\text{Mg}_{3.2}\text{Sb}_{0.5}\text{Bi}_{1.49}\text{Te}_{0.01-x}$  wt% Graphene or MXene samples.

| sample name | density ( $\text{g cm}^{-3}$ ) | relative density (%) |
|-------------|--------------------------------|----------------------|
| $x = 0$     | 5.12                           | 98.5                 |
| $x = 0.2$ G | 5.03                           | 96.7                 |
| $x = 0.4$ G | 4.96                           | 95.3                 |
| $x = 0.6$ G | 4.9                            | 94.2                 |
| $x = 0.3$ M | 5.06                           | 97.3                 |
| $x = 0.6$ M | 5.02                           | 96.5                 |
| $x = 0.9$ M | 4.95                           | 95.2                 |

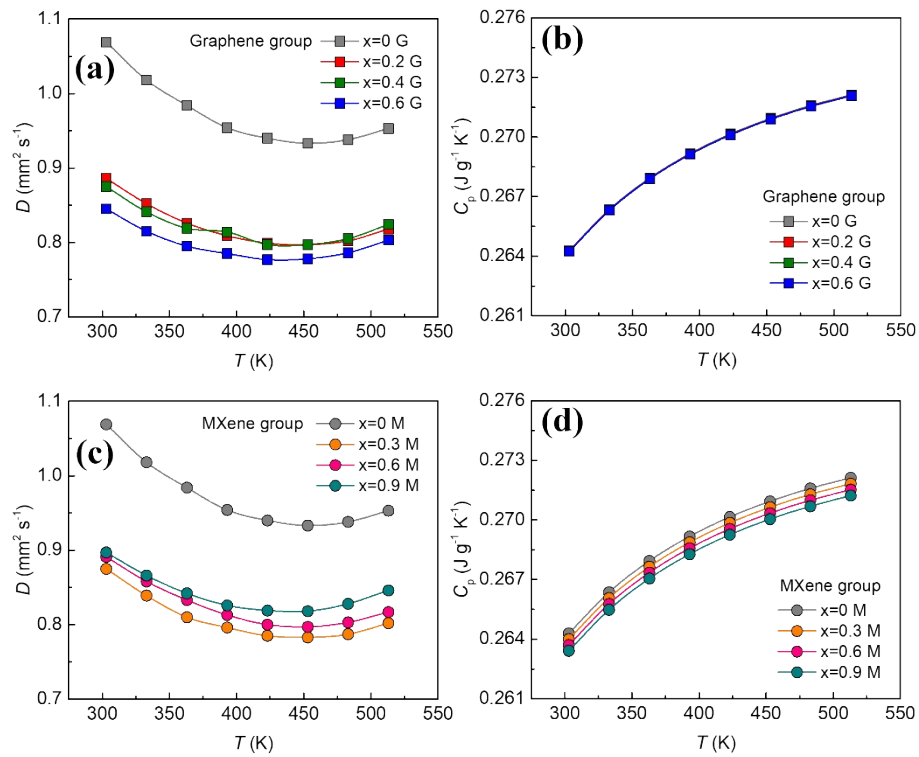

**Fig. S2** (a) Thermal diffusion coefficient and (b) specific heat of Mg<sub>3.2</sub>Sb<sub>0.5</sub>Bi<sub>1.49</sub>Te<sub>0.01-x</sub> wt% Graphene. (c) Thermal diffusion coefficient and (d) specific heat of Mg<sub>3.2</sub>Sb<sub>0.5</sub>Bi<sub>1.49</sub>Te<sub>0.01-x</sub> wt% MXene.

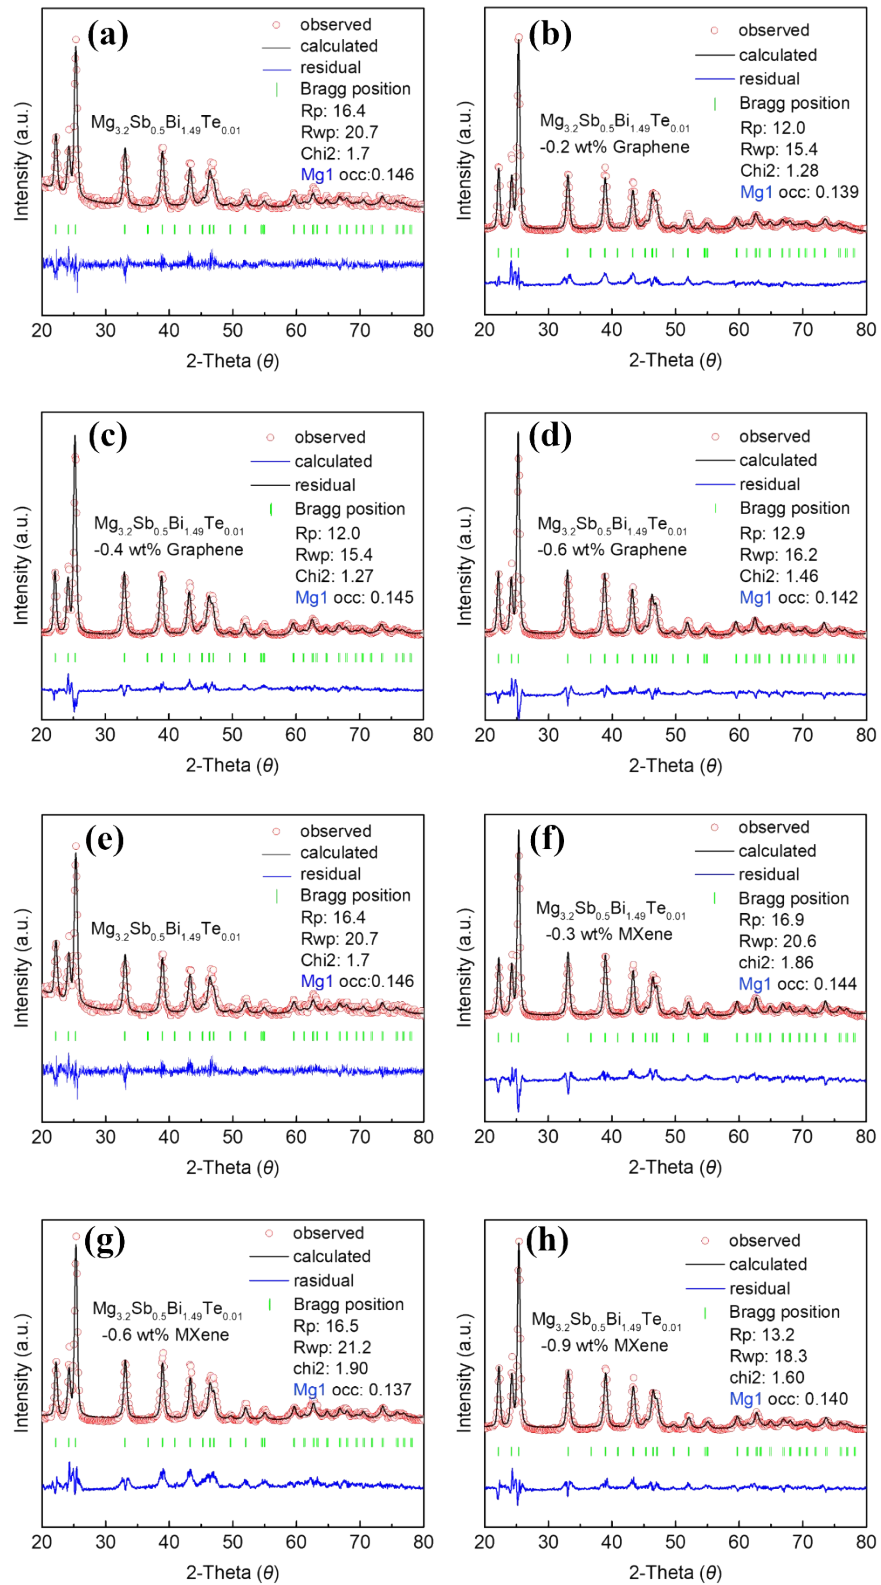

**Fig. S3** (a)-(d) The XRD refinement of  $\text{Mg}_{3.2}\text{Sb}_{0.5}\text{Bi}_{1.49}\text{Te}_{0.01-x}$  wt% Graphene ( $x = 0, 0.2, 0.4$  and  $0.6$ . respectively). (e)-(h) The XRD refinement of  $\text{Mg}_{3.2}\text{Sb}_{0.5}\text{Bi}_{1.49}\text{Te}_{0.01-x}$  wt% MXene ( $x = 0, 0.3, 0.6$  and  $0.9$ . respectively).

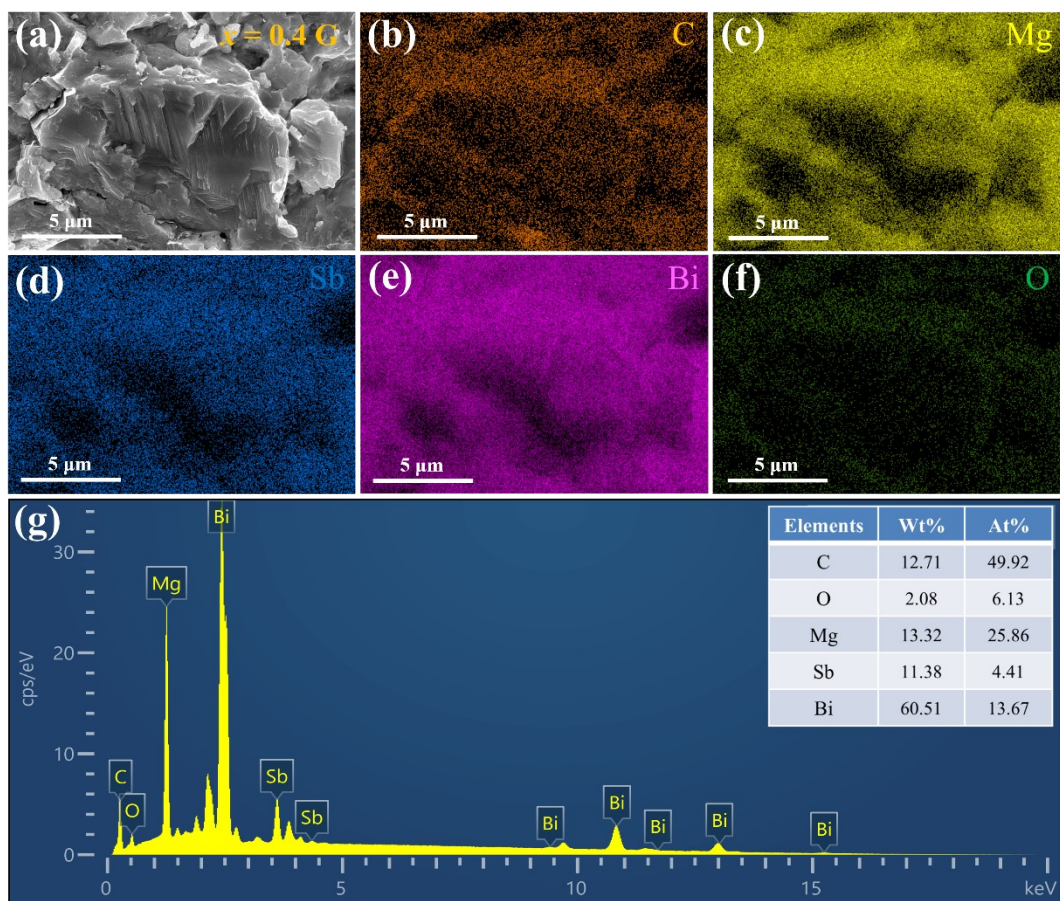

**Fig. S4** (a) The cross-section SEM image of  $x = 0.4$  G with (b-f) elemental maps of C, Mg, Sb, Bi and O, and (g) spectrogram of the total number of distribution maps.

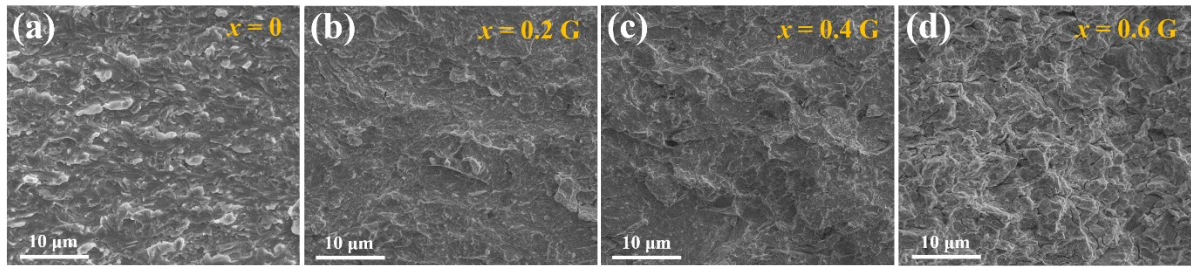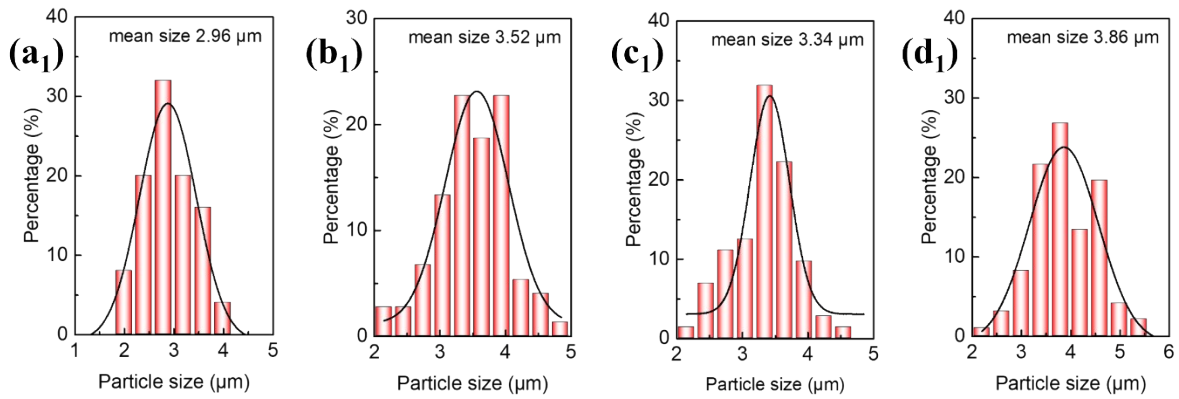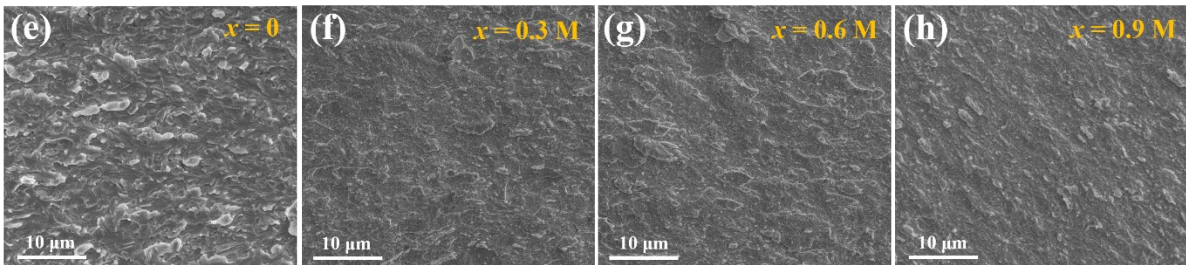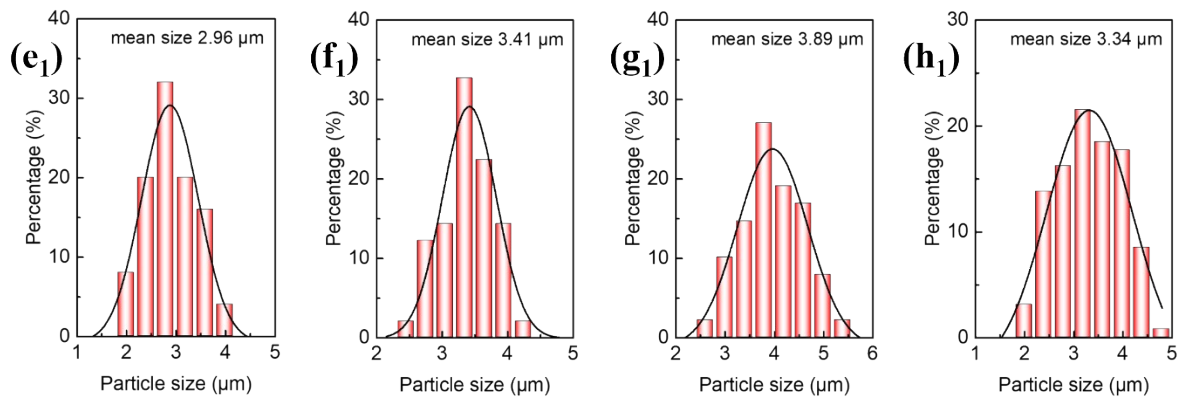

**Fig. S5** (a)-(d) Cross-section SEM images of the  $\text{Mg}_{3.2}\text{Sb}_{0.5}\text{Bi}_{1.49}\text{Te}_{0.01-x}$  wt% Graphene and (a<sub>1</sub>)-(d<sub>1</sub>) are the corresponding grain size statistics respectively. (e)-(h) Cross-section SEM images of the  $\text{Mg}_{3.2}\text{Sb}_{0.5}\text{Bi}_{1.49}\text{Te}_{0.01-x}$  wt% MXene and (e<sub>1</sub>)-(h<sub>1</sub>) are the corresponding grain size statistics respectively.



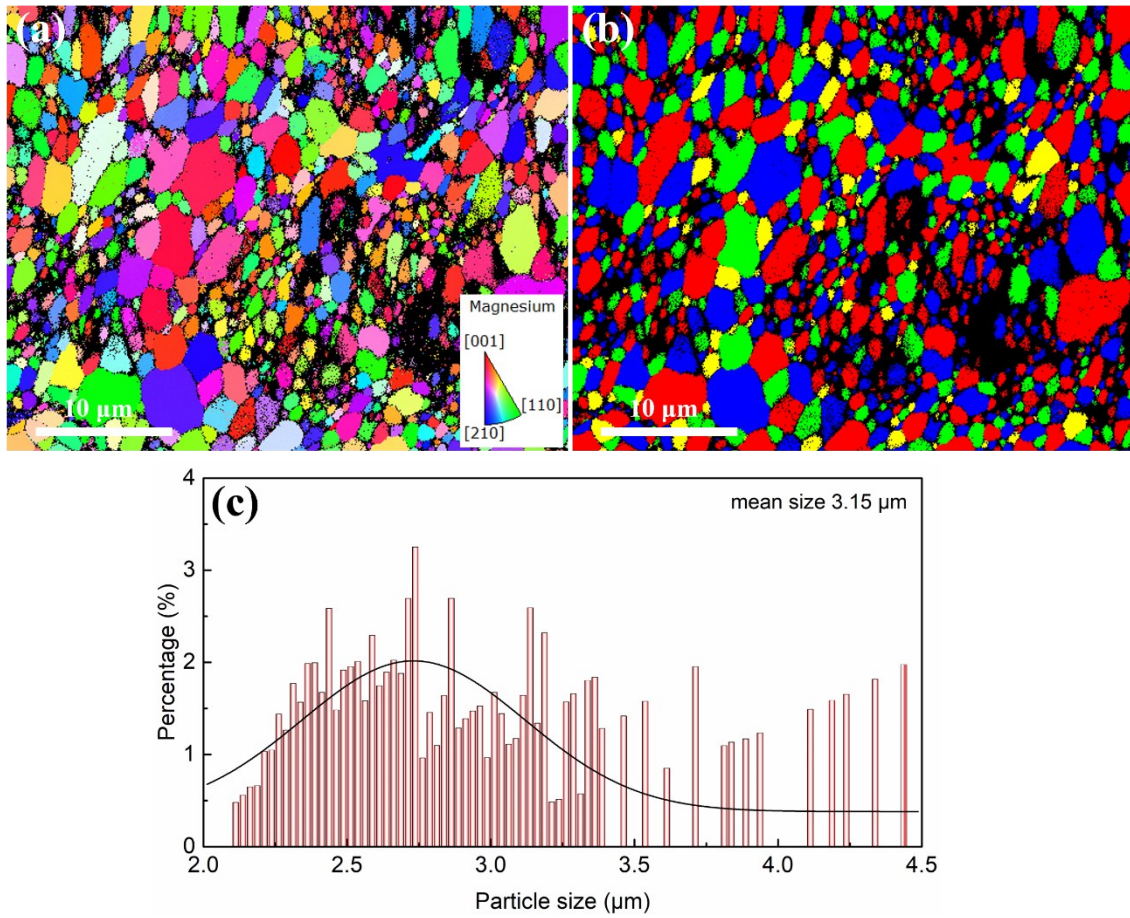

**Fig. S6** (a) and (b) The electron back-scattering diffraction (EBSD) image of  $\text{Mg}_{3.2}\text{Sb}_{0.5}\text{Bi}_{1.49}\text{Te}_{0.01}$ -0.6 wt% MXene sample, (c) the statistics of grain size obtained from the EBSD analyses.

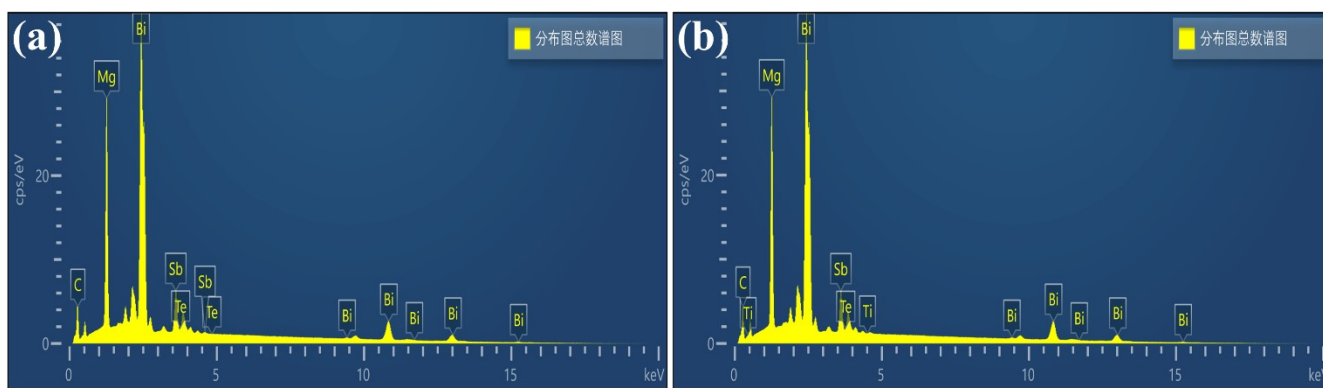

**Fig. S7** Spectrogram of the total number of distribution maps in (a)  $\text{Mg}_{3.2}\text{Sb}_{0.5}\text{Bi}_{1.49}\text{Te}_{0.01}$ -0.4 wt% Graphene and (b)  $\text{Mg}_{3.2}\text{Sb}_{0.5}\text{Bi}_{1.49}\text{Te}_{0.01}$ -0.6 wt% MXene samples.

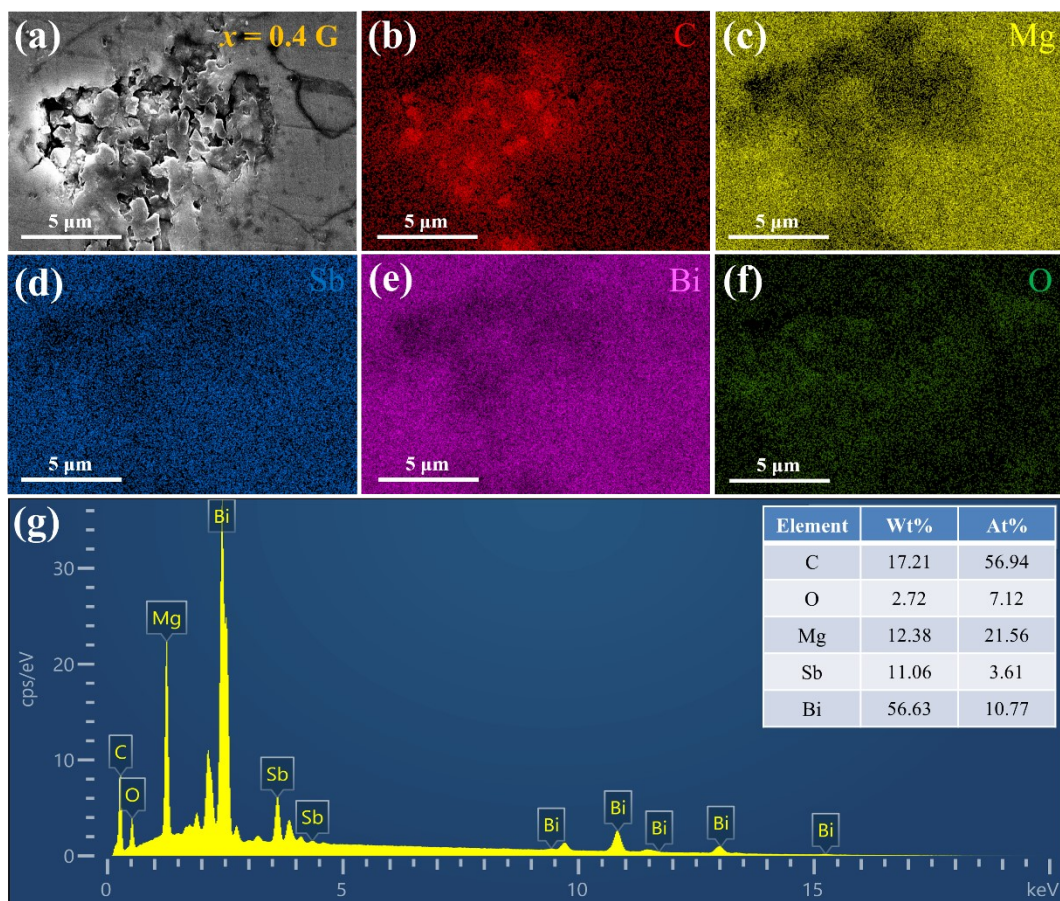

**Fig. S8** (a) The polished surface SEM image of  $x = 0.4$  G with (b-f) elemental maps of C, Mg, Sb, Bi and O, and (g) spectrogram of the total number of distribution maps.

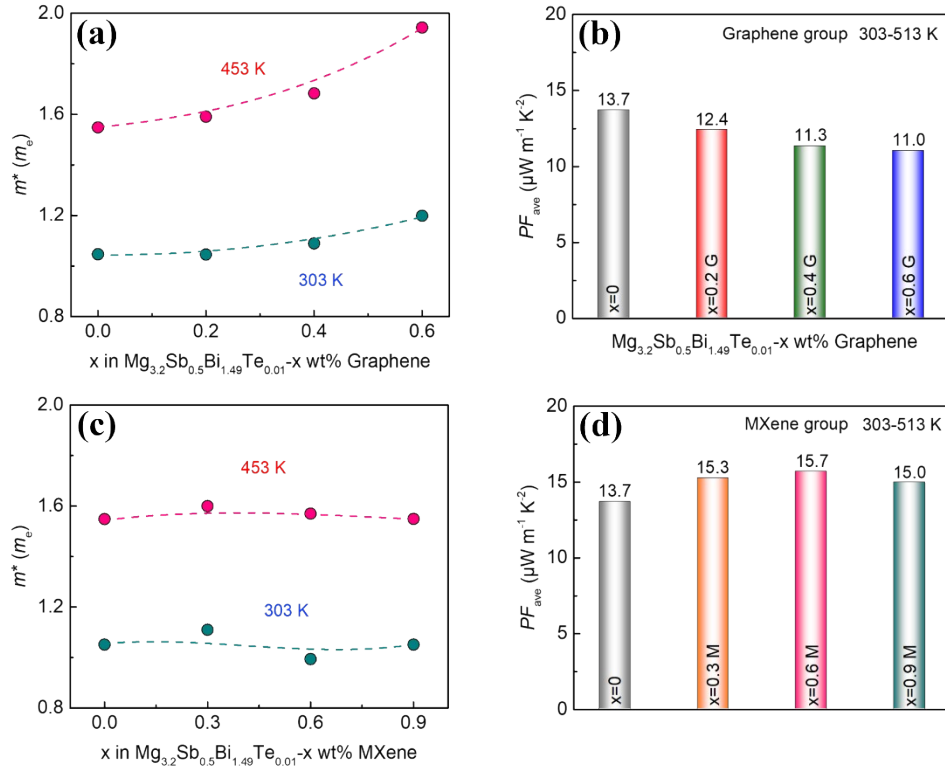

**Fig. S9** (a) Density of states effective mass  $m^*$  and (b) average power factor between 303 and 513 K of  $\text{Mg}_{3.2}\text{Sb}_{0.5}\text{Bi}_{1.49}\text{Te}_{0.01}-x$  wt% Graphene. (c) Density of states effective mass  $m^*$  and (d) average power factor between 303 and 513 K of  $\text{Mg}_{3.2}\text{Sb}_{0.5}\text{Bi}_{1.49}\text{Te}_{0.01}-x$  wt% MXene.

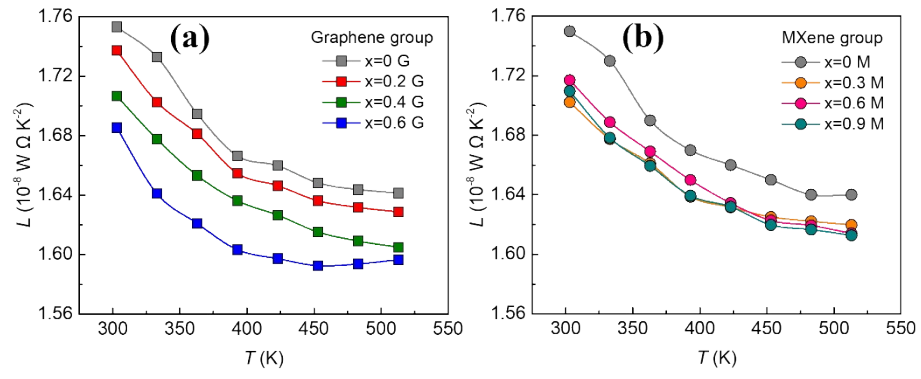

**Fig. S10** Lorenz parameter of (a)  $\text{Mg}_{3.2}\text{Sb}_{0.5}\text{Bi}_{1.49}\text{Te}_{0.01-x}$  wt% Graphene and (b)  $\text{Mg}_{3.2}\text{Sb}_{0.5}\text{Bi}_{1.49}\text{Te}_{0.01-x}$  wt% MXene.

## References

1. J. J. Kuo, S. D. Kang, K. Imasato, H. Tamaki, S. Ohno, T. Kanno and G. J. Snyder, *Energy Environ. Sci.*, 2018, **11**, 429-434.
2. G. J. Snyder, A. H. Snyder, M. Wood, R. Gurunathan, B. H. Snyder and C. Niu, *Adv. Mater.*, 2020, **32**, e2001537.
